# Supplementary material for: Discovery and characterization of Isofistularin-3, a marine brominated alkaloid, as a new DNA demethylating agent inducing cell cycle arrest and sensitization to TRAIL in cancer cells
Source: Oncotarget. 2016 Mar 19;7(17):24027–49. doi: 10.18632/oncotarget.8210 (PMC5029682; doi:10.18632/oncotarget.8210)
Supplement: Supplementary file 1 [file oncotarget-07-24027-s001.pdf]

## Discovery and characterization of Isofistularin-3, a marine brominated alkaloid, as a new DNA demethylating agent inducing cell cycle arrest and sensitization to TRAIL in cancer cells

### Supplementary Materials

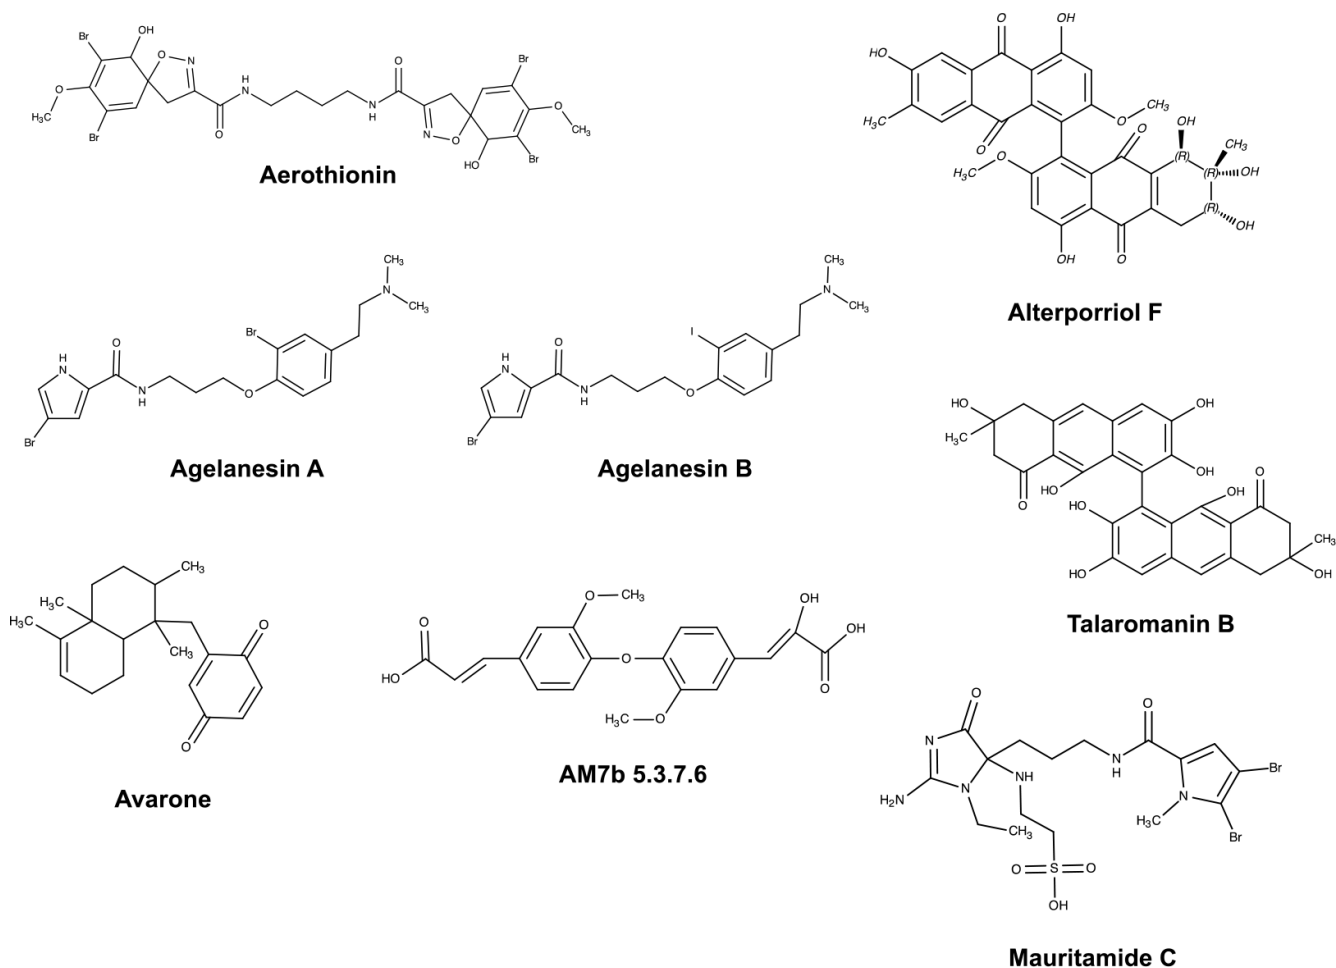

Supplementary Figure S1: Chemical structure representation of hit compounds found to inhibit *in vitro* DNMT1 activity in Supplementary Table S1.

**A**

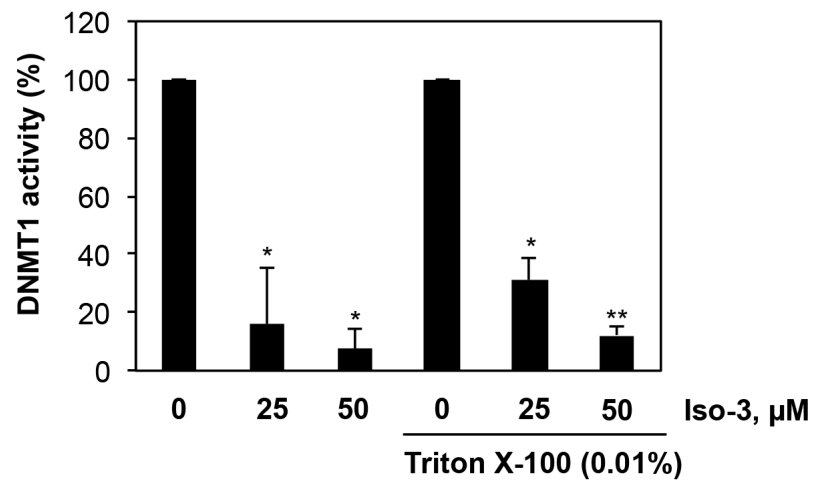

**B**

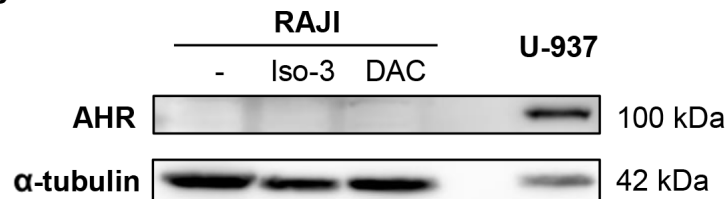

**Supplementary Figure S2: (A) DNMT1 activity assay was performed in presence or absence of 0.01% TritonX-100.** Histogram represents the mean  $\pm$  SD of at least 3 independent experiments. **(B)** AHR protein levels were detected by Western Blot analysis upon Iso-3 (25  $\mu$ M) or DAC (1  $\mu$ M) treatment for 72 h in RAJI cells. U-937 cells were used as positive control for AHR expression. Blot is representative of three independent experiments.

**A**

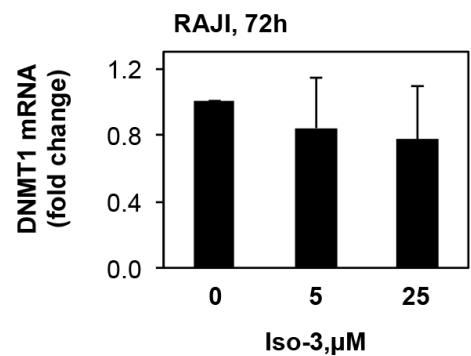

**B**

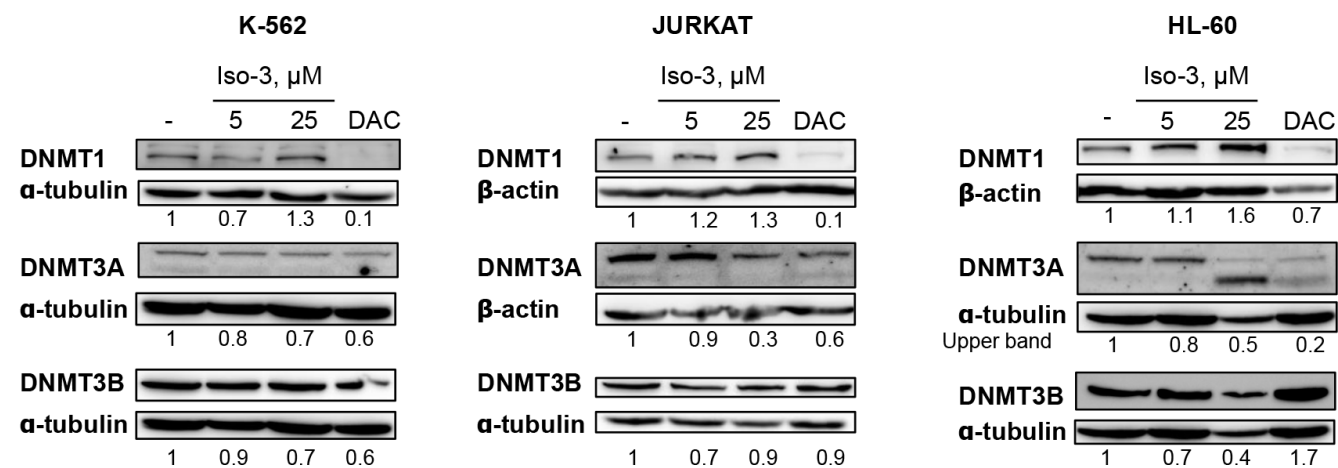

**Supplementary Figure S3: (A) DNMT1 mRNA levels in RAJI cells were measured by RT-PCR after 72 h Iso-3 treatment.** Histograms represent the mean  $\pm$  SD of three independent experiments. **(B) Western Blot analysis of DNMT isoforms in K-562, JURKAT and HL-60 cells after 72 h treatment with indicated Iso-3 doses or 1  $\mu\text{M}$  DAC.** Blots are representative of three independent experiments.

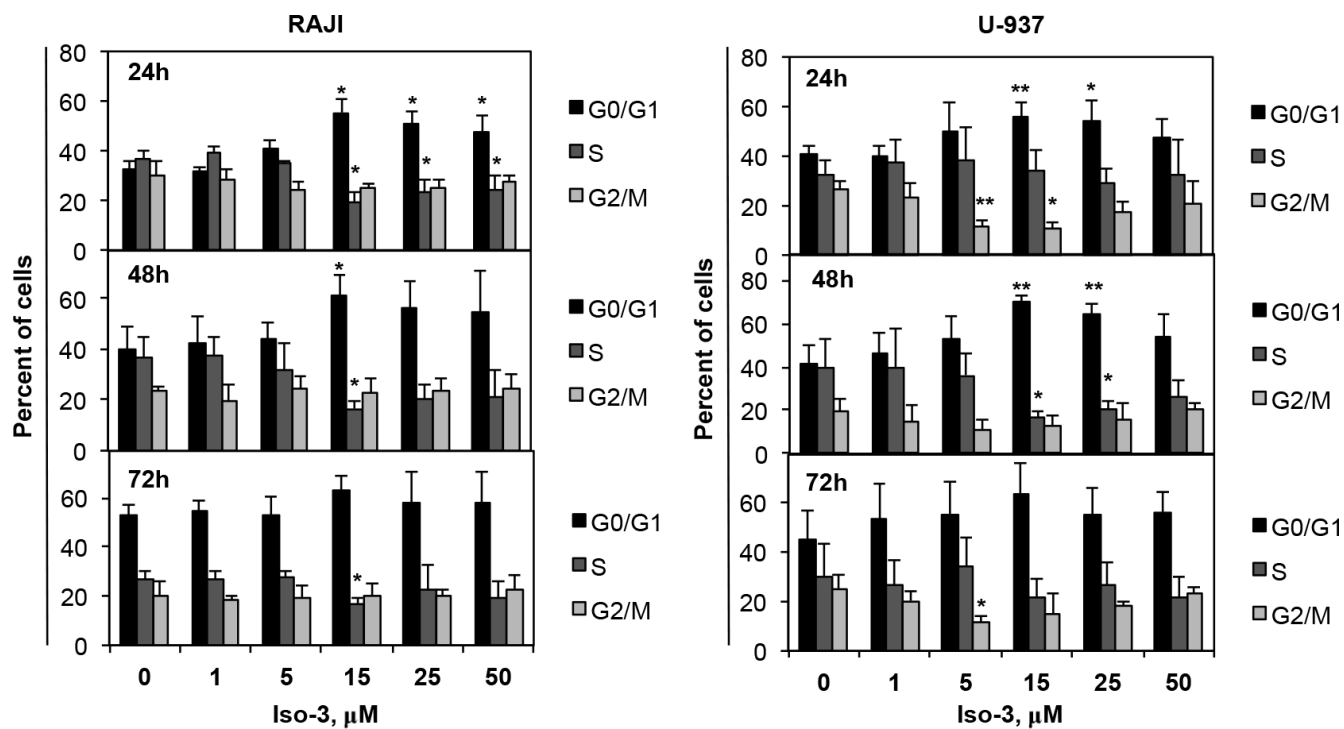

**Supplementary Figure S4: Cell cycle progression analysis of RAJI and U-937 cells after 24, 48 and 72 h of Iso-3 treatment at the indicated doses. Histograms represent the mean  $\pm$  SD of three independent experiments.**

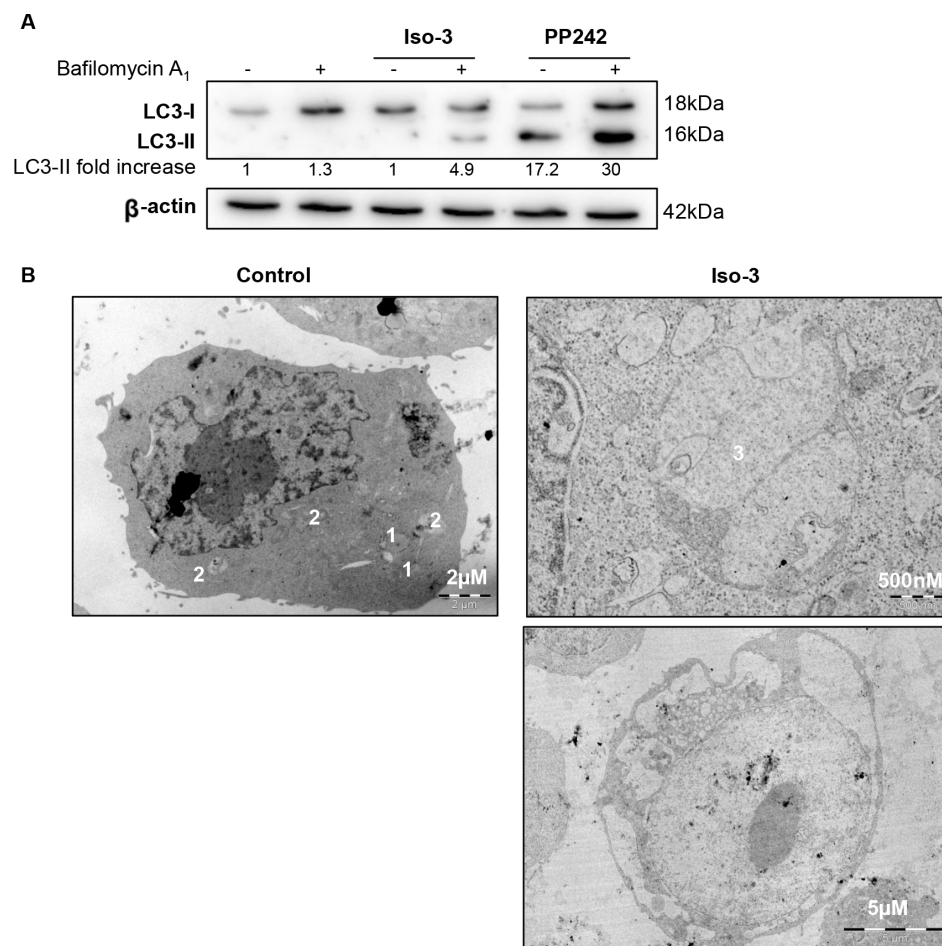

**Supplementary Figure S5: (A) Western blot analysis of LC3 conversion in RAJI cells treated with 15  $\mu$ M Iso-3 for 12 h.** Where indicated, bafilomycin A<sub>1</sub> (40 nM) was added 2 h before harvesting. Cells treated 4 h with PP242 (10  $\mu$ M) were used as a positive control for autophagy induction. Blot is representative of three independent experiments. **(B)** RAJI control cells exhibit low basal autophagy levels. (1) Lysosomes, (2) autolysosomes. A RAJI cell treated with 15  $\mu$ M Iso-3 for 24 h shows a large autophagocytic vacuole (upper image); in extreme cases, autophagy induction culminates in autophagic cell death, evidenced by extensive vacuolization, organelle depletion while nucleus is non-pyknotic (lower image). (3) A large autophagocytic vacuole with membrane remnants.

A

PBS injection

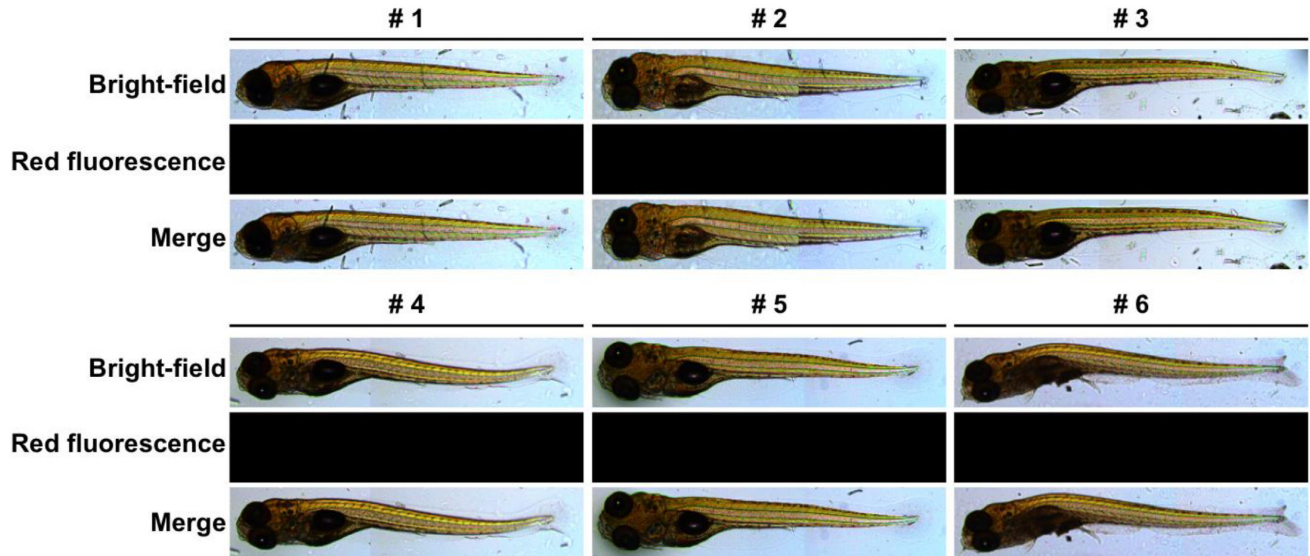

Untreated SH-SY5Y

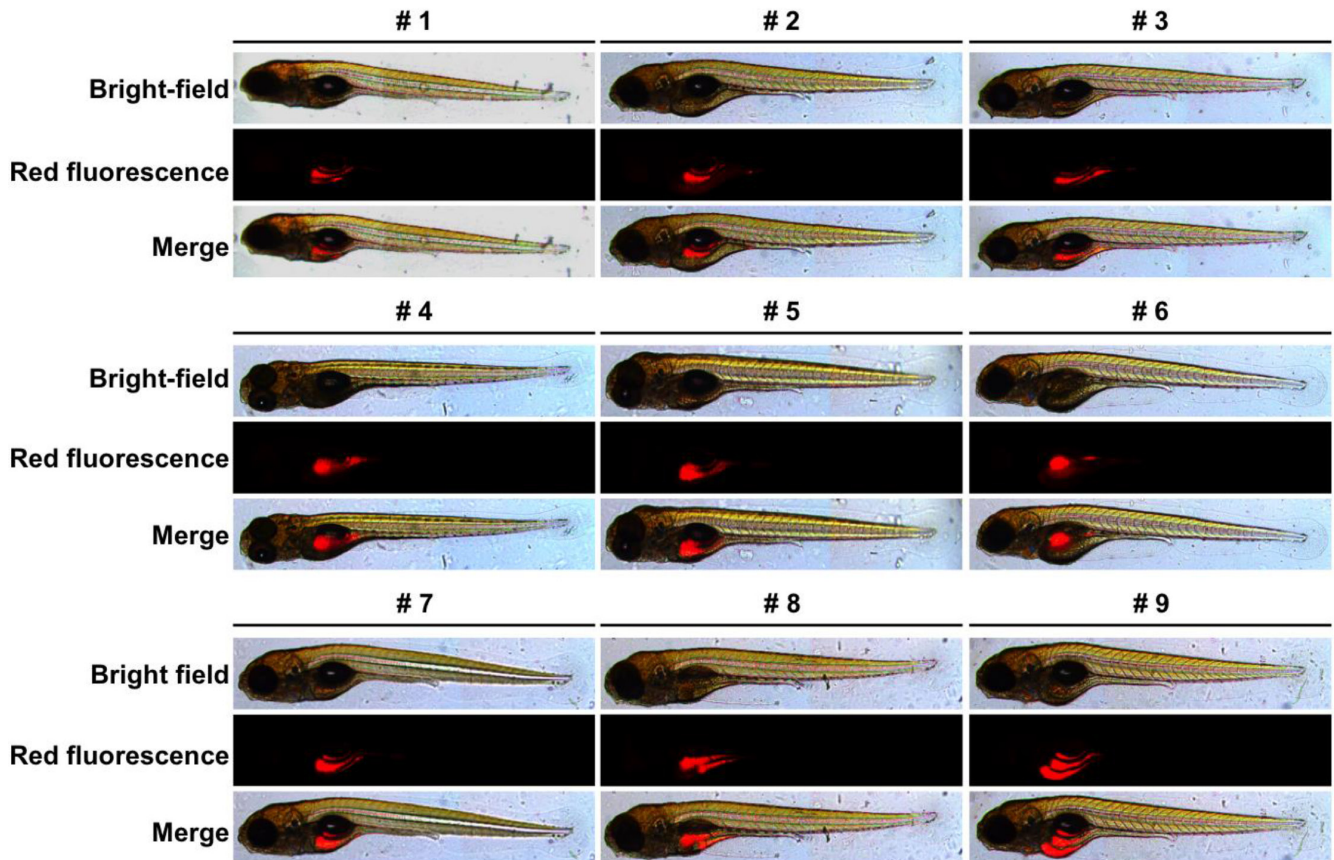

### 15 $\mu$ M Iso-3-treated SH-SY5Y

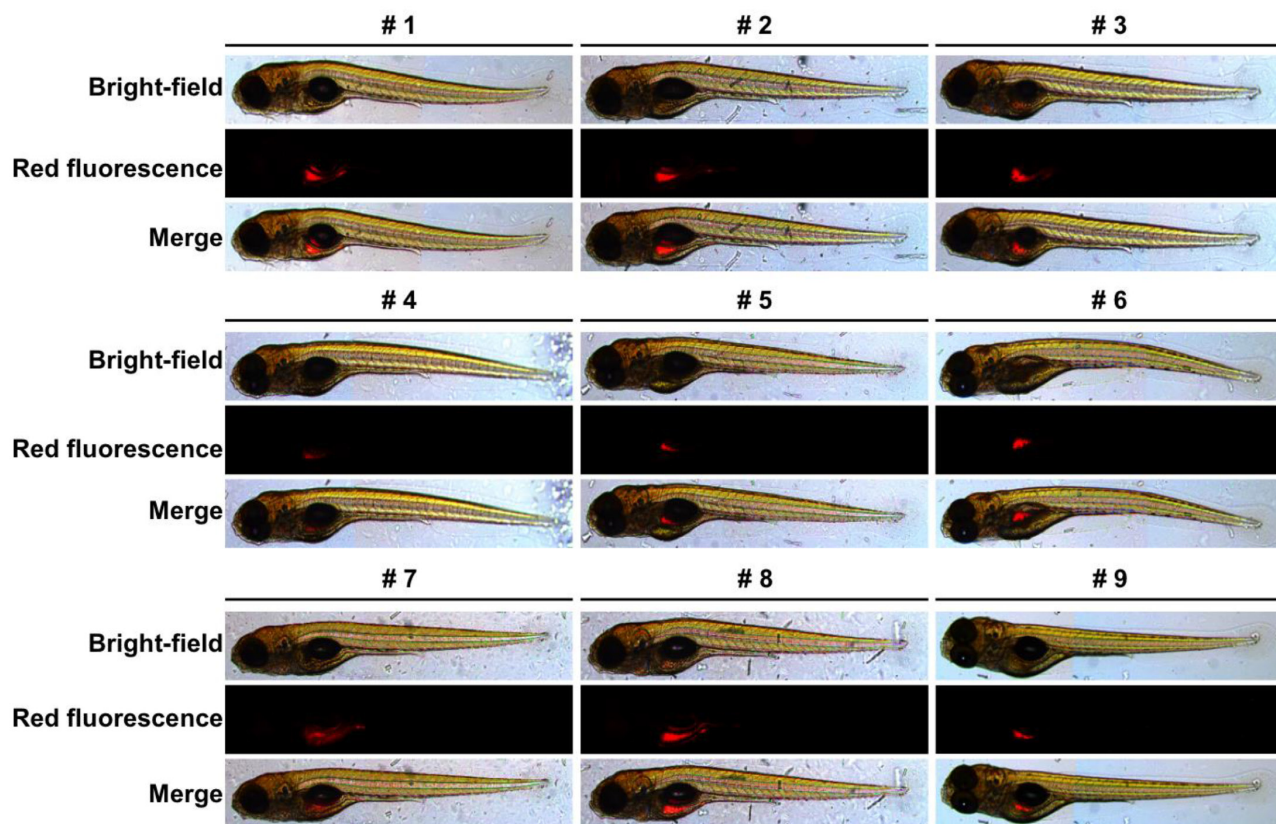

### 20 $\mu$ M Iso-3-treated SH-SY5Y

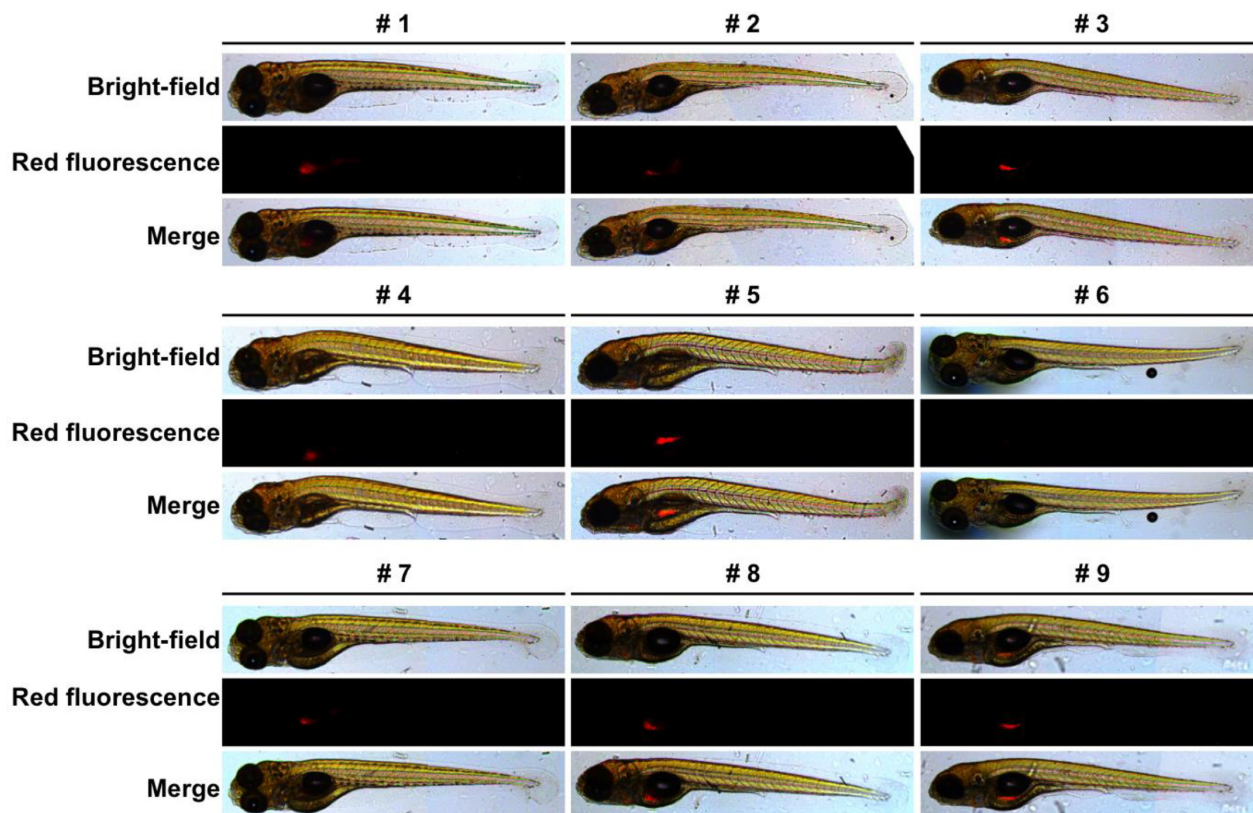

25 $\mu$ M Iso-3-treated SH-SY5Y

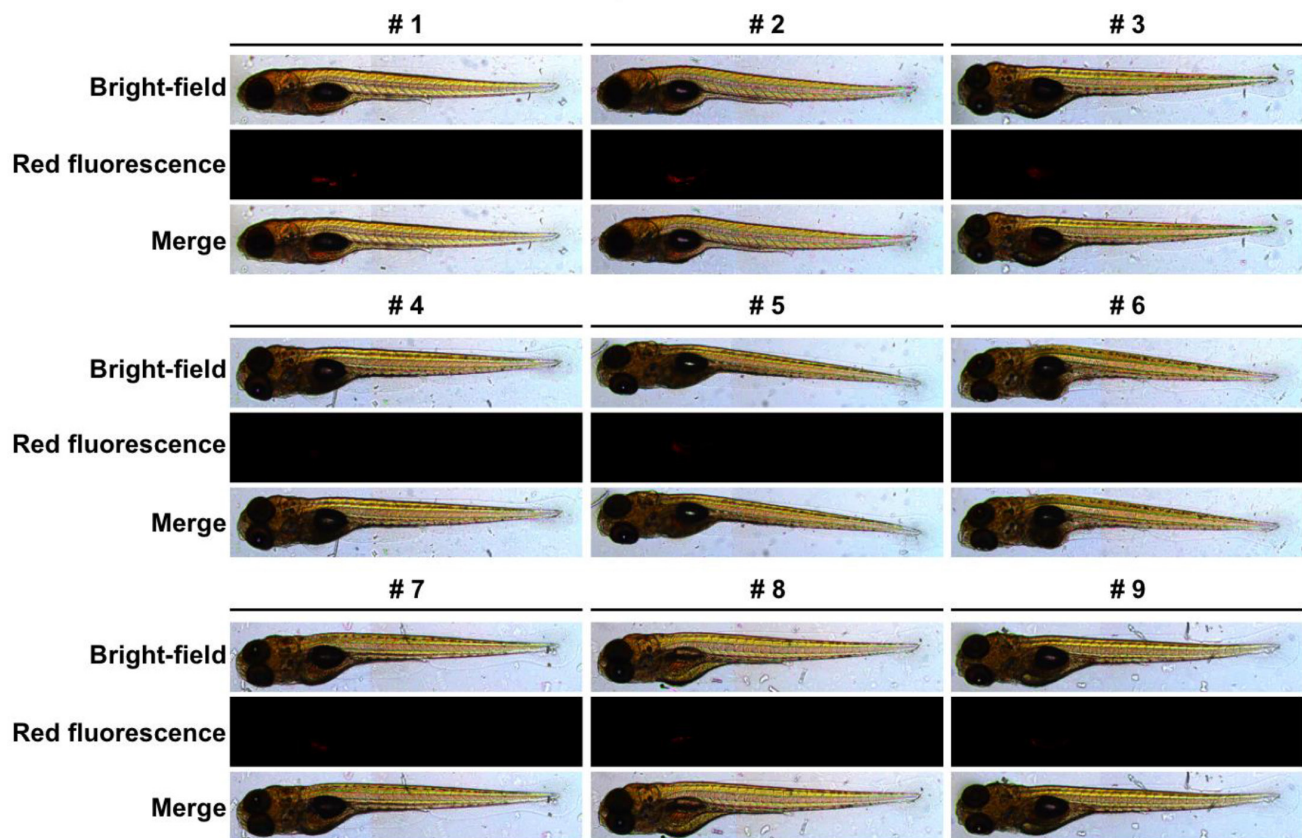

B

PBS injection

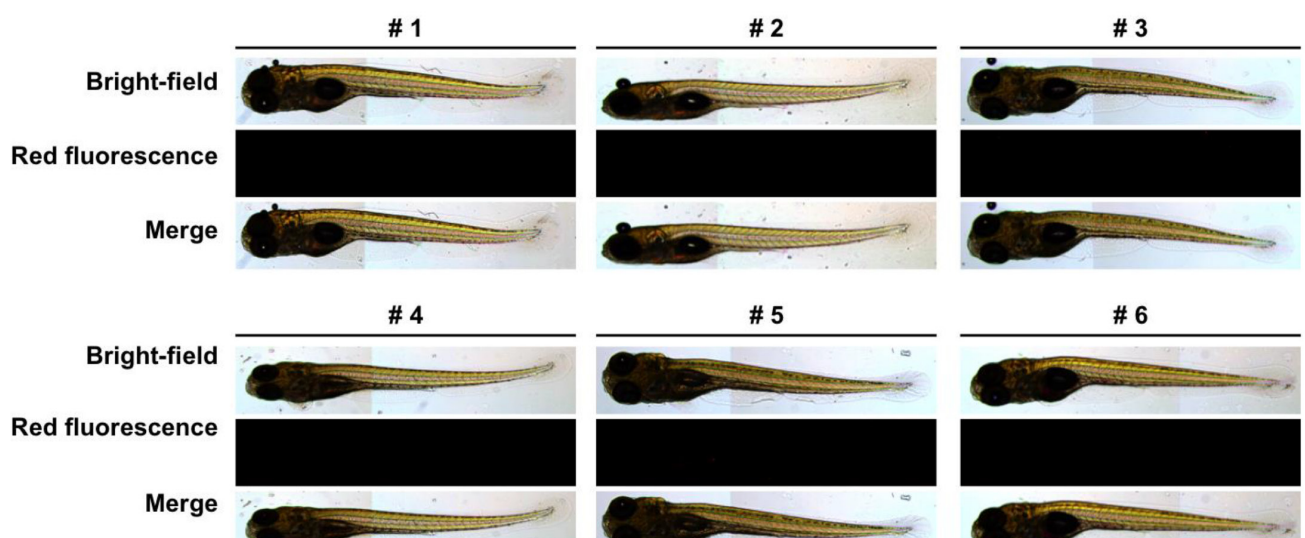

### Untreated PC-3

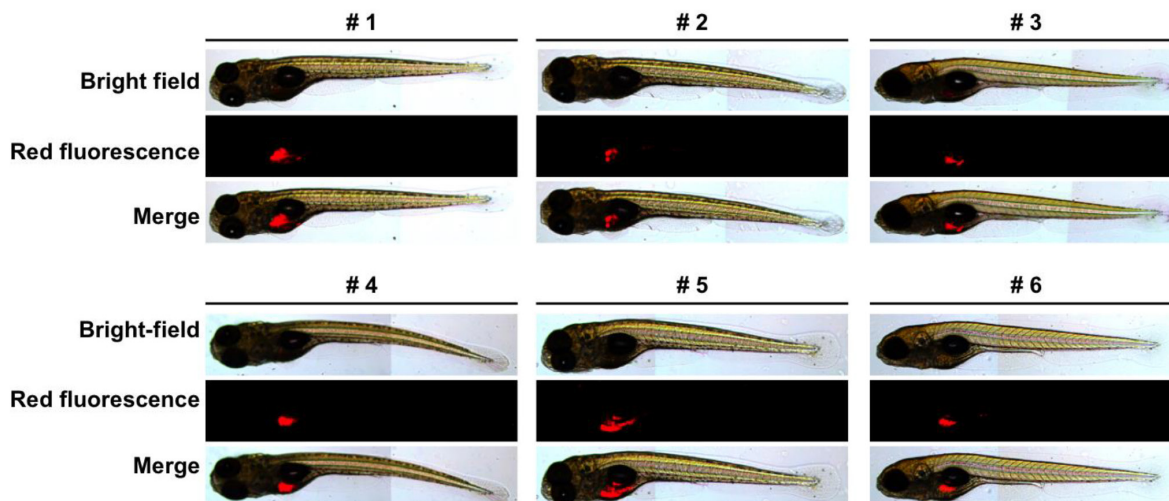

### 15 $\mu$ M Iso-3-treated PC-3

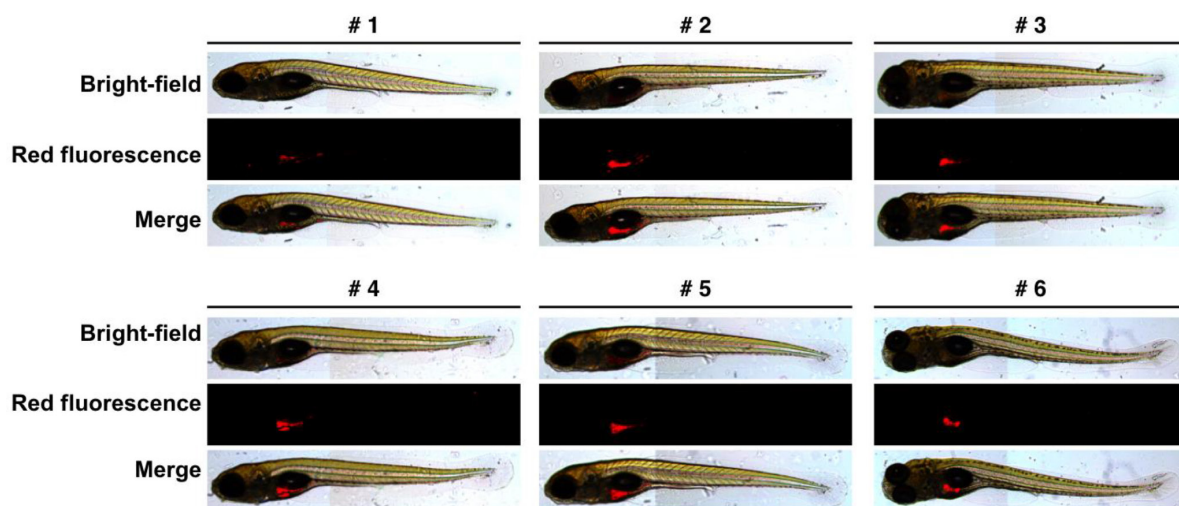

### 20 $\mu$ M Iso-3-treated PC-3

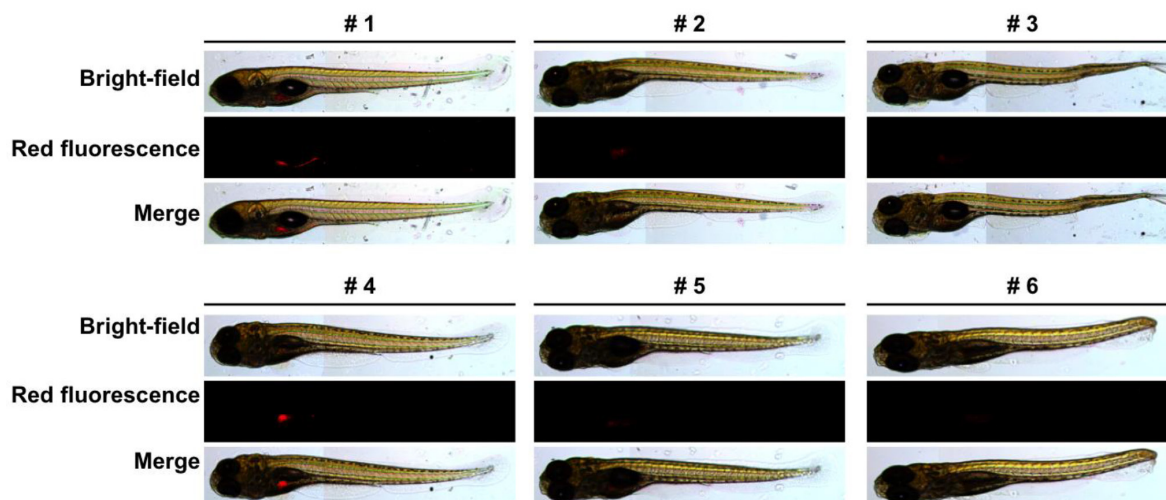

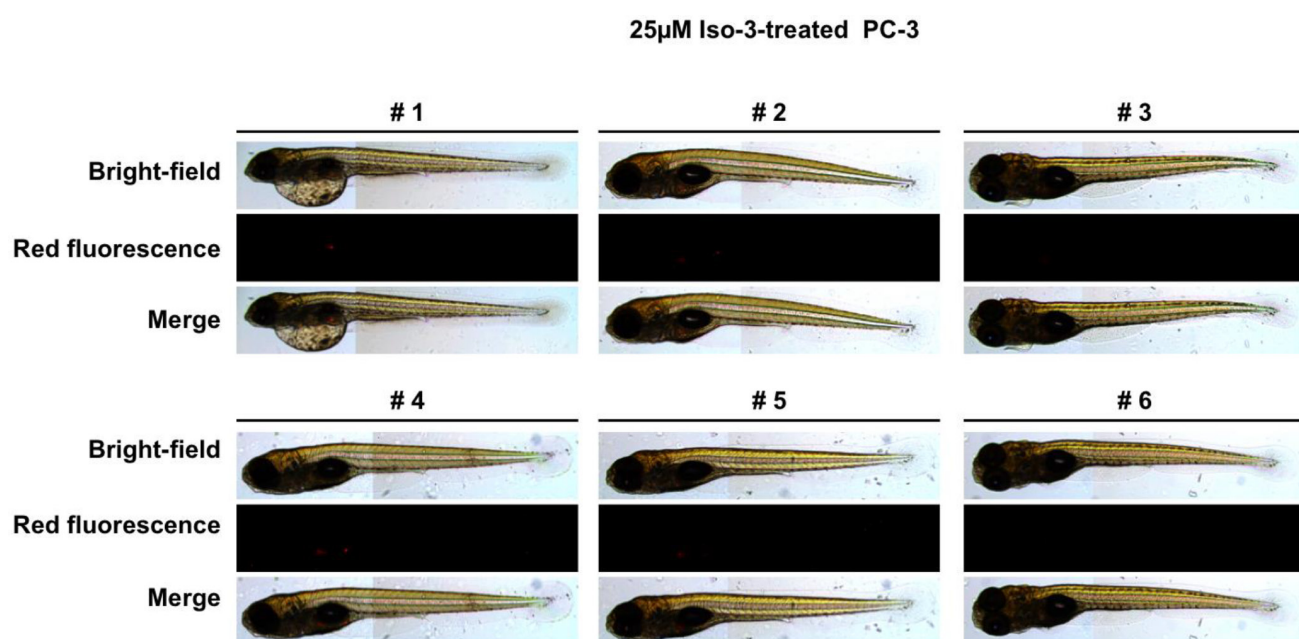

**Supplementary Figure S6: Fluorescent SH-SY5Y (A) or PC-3 (B) cells were treated or not *in vitro* at different concentrations of Iso-3 for 24 h and then injected into the zebrafish yolk sac. Fluorescence was scored after 72 h. PBS injection was used as a control for injection toxicity.**

**Supplementary Table S1: Compounds with *in vitro* DNMT inhibitory activity**

| <b>Compound</b>         | <b>Residual total DNMT activity at 25 <math>\mu</math>M (%)</b> | <b>Residual DNMT1 activity at 25 <math>\mu</math>M (%)</b> |
|-------------------------|-----------------------------------------------------------------|------------------------------------------------------------|
| <b>Aerothionin</b>      | 76.3 $\pm$ 18.1                                                 | 77.9 $\pm$ 9.1                                             |
| <b>Agelanesin A + B</b> | 69.6 $\pm$ 10.4                                                 | Inactive*                                                  |
| <b>Alterporriol F</b>   | 72.6 $\pm$ 32.0                                                 | Inactive                                                   |
| <b>AM7b 5.3.7.6</b>     | Not tested                                                      | 66.4 $\pm$ 4.6**                                           |
| <b>Avarone</b>          | 41.9 $\pm$ 7.0                                                  | 54.9 $\pm$ 4.7                                             |
| <b>Isofistularin-3</b>  | 73.4 $\pm$ 16.2                                                 | 43.2 $\pm$ 12.4                                            |
| <b>Mauritamide C</b>    | 78.3 $\pm$ 4.1                                                  | Not tested                                                 |
| <b>Talaromanin B</b>    | 37.0 $\pm$ 23.4                                                 | 12.5 $\pm$ 2.6                                             |

\*Inactive means less than 15% inhibition at 25  $\mu$ M, \*\*Residual DNMT1 activity at 50  $\mu$ M.

Values represent the mean  $\pm$  SD of 3 independent experiments. Structures are displayed in Supplementary Figure 1 (except for Isofistularin-3, Figure 1).
